# Supplementary material for: Development of ZnO@rGO nanocomposites for the enzyme free electrochemical detection of urea and glucose
Source: Royal Society of Chemistry journal article supplement (doi:10.1039/d0ma00445f), 2020-01-01
Supplement: d0ma00445f1.pdf [file d0ma00445f1.pdf]

## Supporting Information

K. B. Babitha<sup>1</sup>, P. S. Soorya<sup>1</sup>, A. Peer Mohamed<sup>1</sup>, R. B. Rakhi<sup>1,2,\*</sup>, and S. Ananthakumar<sup>1,\*</sup>

<sup>1</sup>Functional Materials Section, Materials Science and Technology Division,  
CSIR-National Institute for Interdisciplinary Science and Technology,  
Industrial estate P.O., Thiruvananthapuram-695019, Kerala, INDIA

<sup>2</sup>Department of Physics, University of Kerala, Kariavattom P.O., Thiruvananthapuram-  
695581, Kerala, INDIA

\* Corresponding Author. Tel.: +91 471 2515289; fax: +91 471 2491712

<sup>1</sup>E-mail addresses: [ananthakumar70@gmail.com](mailto:ananthakumar70@gmail.com); [ananthakumars@niist.res.in](mailto:ananthakumars@niist.res.in)

<sup>1,2</sup>E-mail addresses: [rakhisarath@gmail.com](mailto:rakhisarath@gmail.com); [rakhiraghavanbaby@niist.res.in](mailto:rakhiraghavanbaby@niist.res.in)

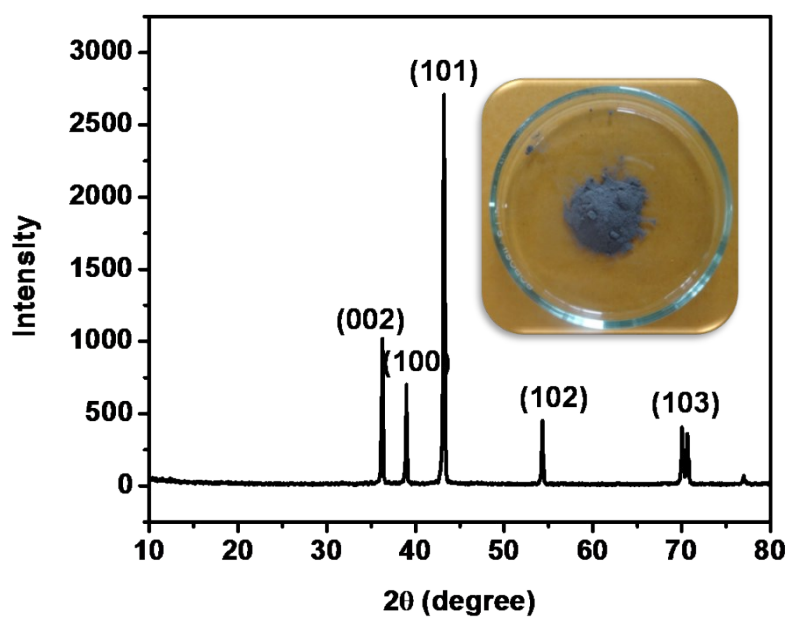

**Fig. S1** XRD pattern of Zn dust. Inset is the photographic image of Zn dust.

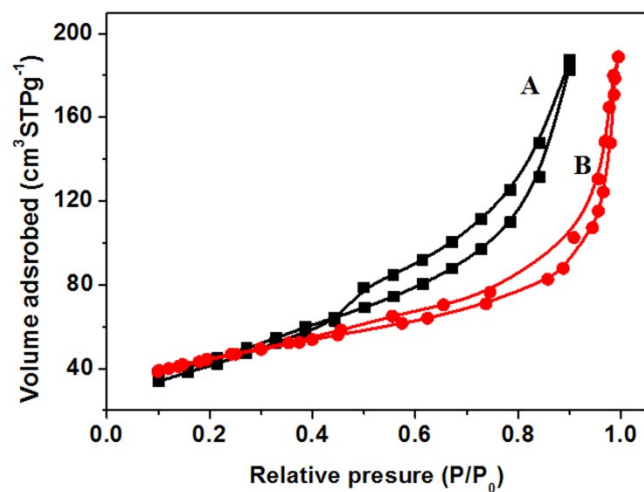

Fig. S2 N<sub>2</sub> adsorption isotherm of (A) GO and (B) rGO.

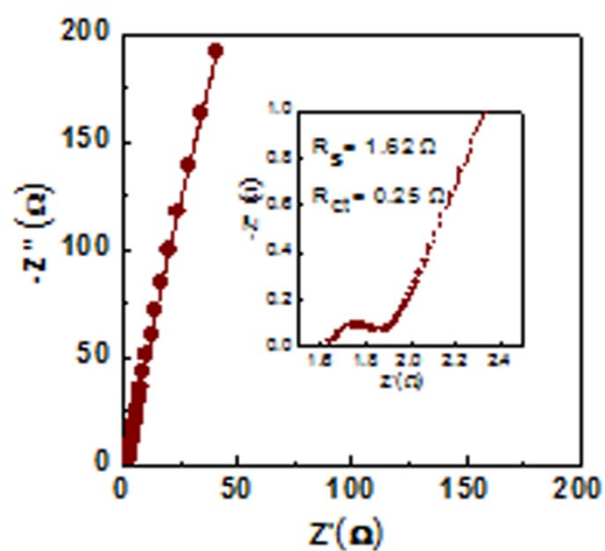

Fig. S3. Nyquist plot of rGO modified GCE.

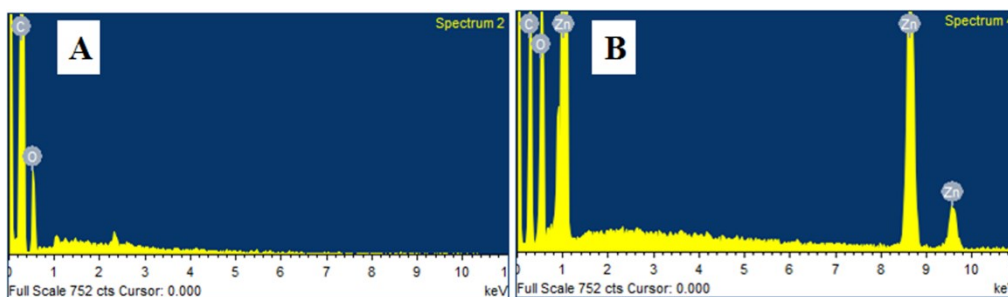

Fig. S4 EDS spectra of (A) rGO and (B) ZSs@1rGO.

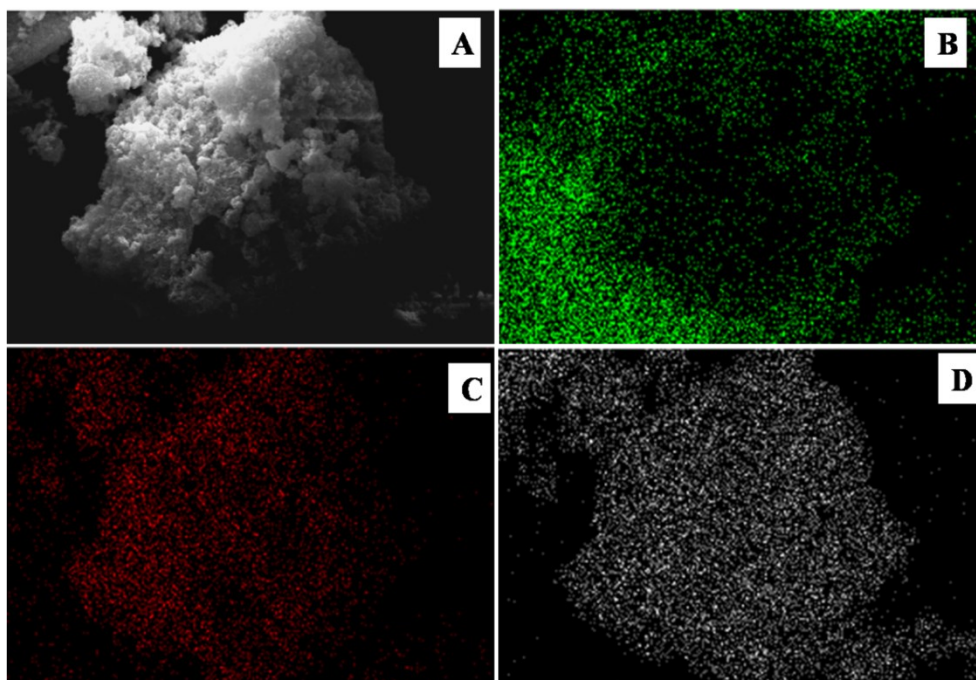

**Fig. S5** Elemental mapping of ZSs@1rGO.
